# Supplementary material
Source: PubMed Central journal article supplement (PMC1838450)
Supplement: pnas_0608721104_6.pdf [file pnas_0608721104_6.pdf]

Table 1. Expression of PcG in follicular lymphoma

| Gene                       | Mean GC | Mean FL | T-stat | p value                    |
|----------------------------|---------|---------|--------|----------------------------|
| <b><i>PRC1 members</i></b> |         |         |        |                            |
| CBX7                       | 0.091   | 0.776   | -6.015 | <b>3.8x10<sup>-5</sup></b> |
| RING1                      | 0.68    | 0.749   | -0.479 | 0.644                      |
| RNF2                       | -0.888  | -1.037  | 0.259  | 0.807                      |
| PHC1                       | 0.339   | -0.265  | 5.685  | <b>8.6x10<sup>-5</sup></b> |
| PHC2                       | 0.525   | 0.411   | 0.544  | 0.595                      |
| PHC3                       | -1.456  | -1.697  | 0.555  | 0.596                      |
| BMI1                       | -0.517  | -0.452  | -0.189 | 0.854                      |
| RNF134                     | -0.215  | -0.972  | 3.219  | <b>0.012</b>               |
| RNF3                       | -1.121  | -0.598  | -0.974 | 0.36                       |
| <b><i>PRC2 members</i></b> |         |         |        |                            |
| EZH1                       | -0.208  | -0.723  | 1.858  | 0.09                       |
| EZH2                       | 0.421   | -0.841  | 4.397  | <b>0.001</b>               |
| SUZ12                      | 0.743   | -0.072  | 5.844  | <b>6.1x10<sup>-5</sup></b> |
| EED                        | 0.489   | -0.165  | 2.659  | <b>0.02</b>                |

Gene expression values in germinal center (GC) and follicular lymphoma (FL) as reported in Ramamswamy *et al.* (1). Values were obtained from ONCOMINE (<http://www.oncomine.org>). When the p value is shown in red/green, it means the increase/decrease of the expression of that PcG gene in FL vs. GC is significant (p value <0.05).

1. Ramaswamy, S., Tamayo, P., Rifkin, R., Mukherjee, S., Yeang, C. H., Angelo, M., Ladd, C., Reich, M., Latulippe, E., Mesirov, J. P., Poggio, T., Gerald, W., Loda, M., Lander, E. S. & Golub, T. R. (2001) *Proc Natl Acad Sci U S A* **98**, 15149-54.
