# Supplementary material
Source: PubMed Central journal article supplement (PMC1838450)

RNA level / DNA copy number

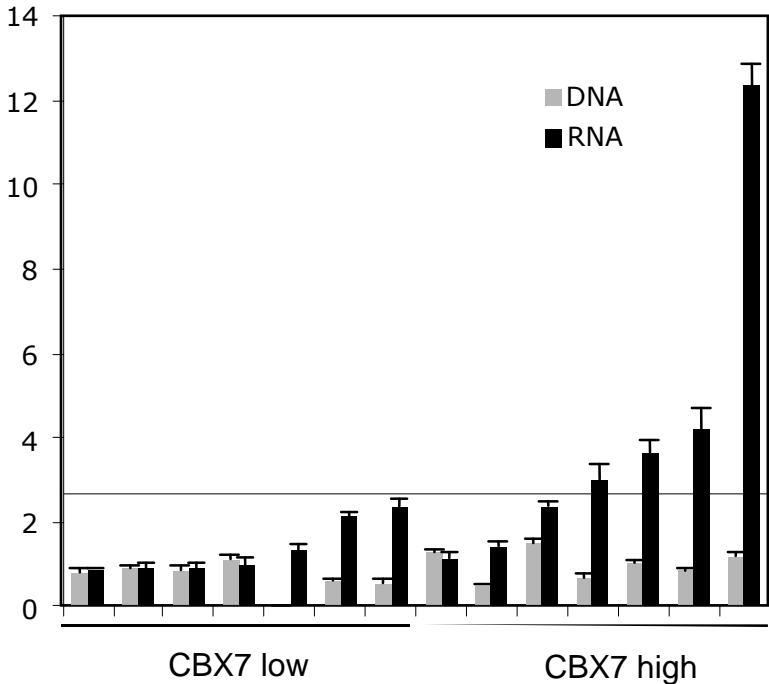

Supplement: pnas_0608721104_1.pdf [file pnas_0608721104_1.pdf]

# BMI1

---

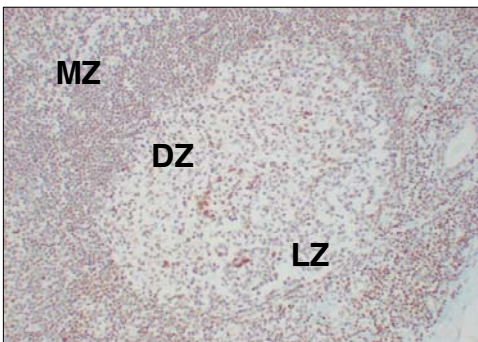

Low magnification

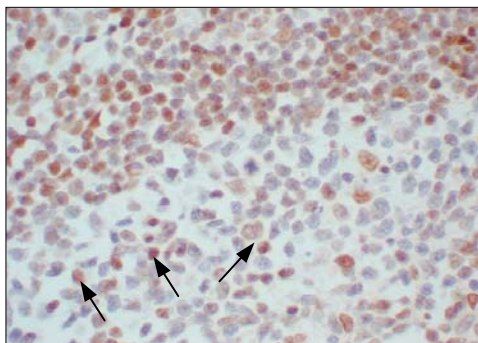

High magnification

Supplement: pnas_0608721104_2.pdf [file pnas_0608721104_2.pdf]

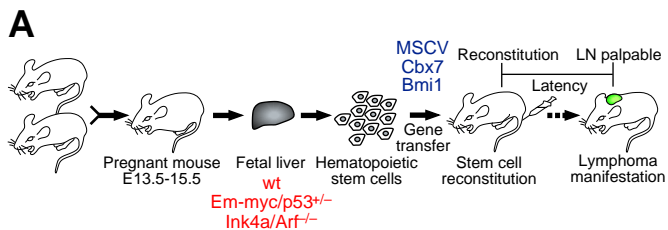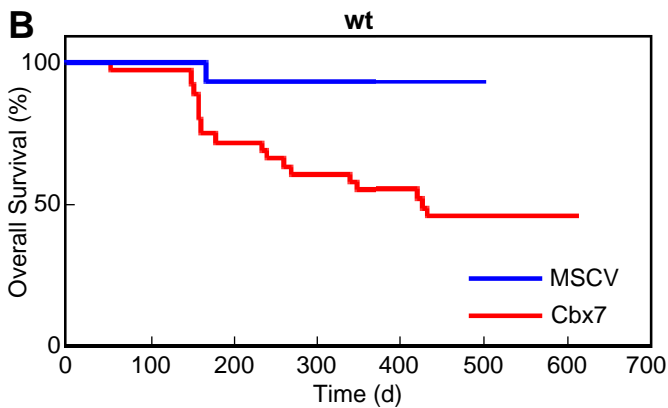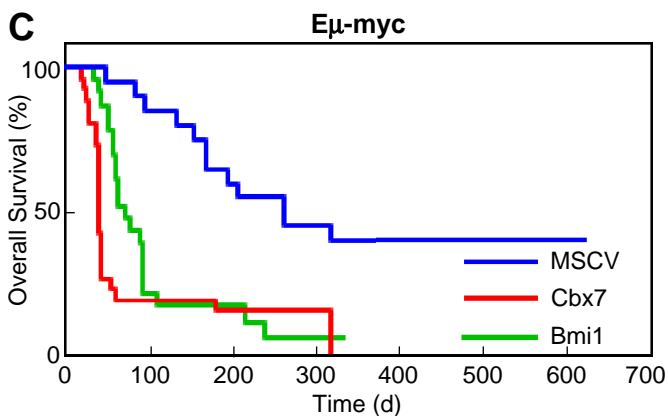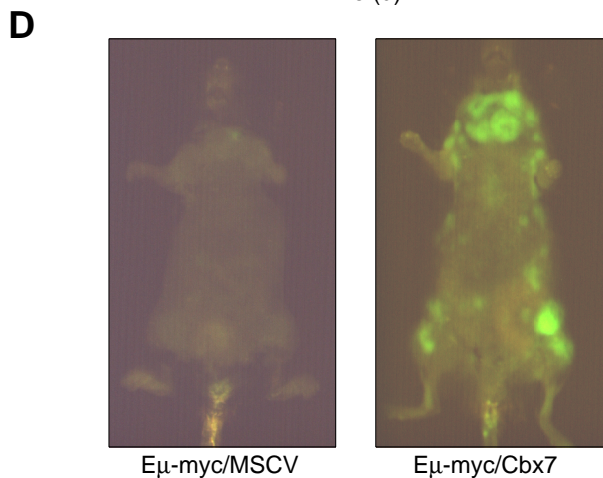

Supplement: pnas_0608721104_3.pdf [file pnas_0608721104_3.pdf]

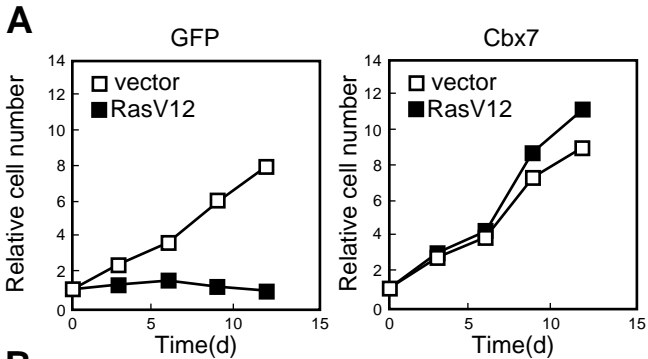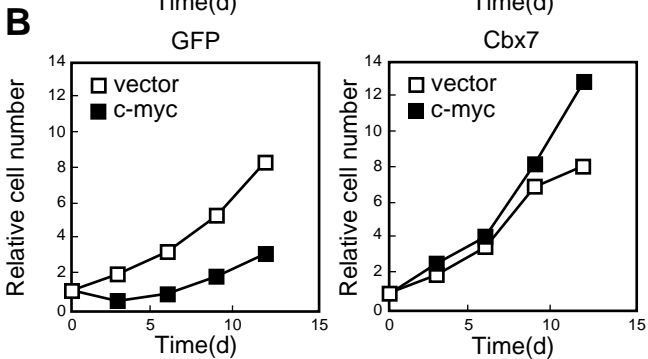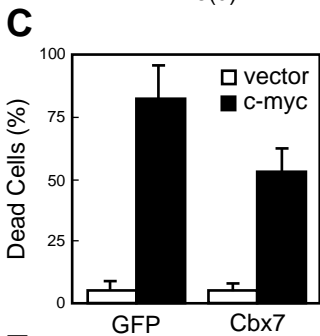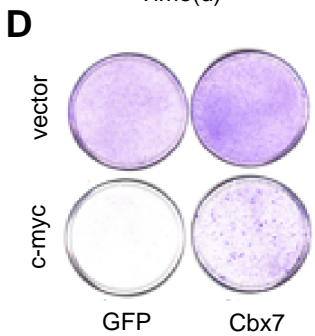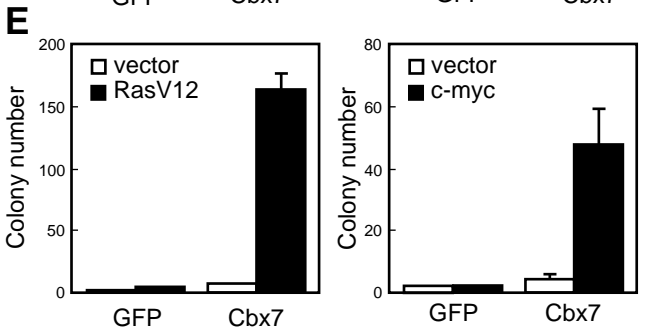

Supplement: pnas_0608721104_4.pdf [file pnas_0608721104_4.pdf]

**A**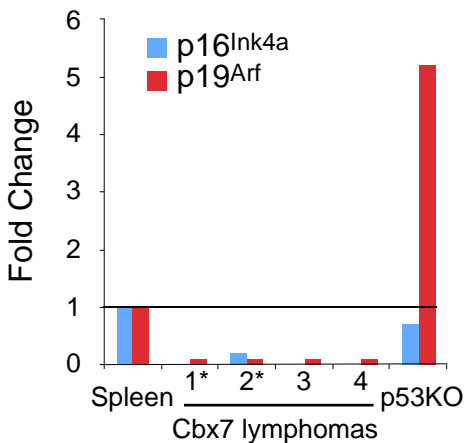**B**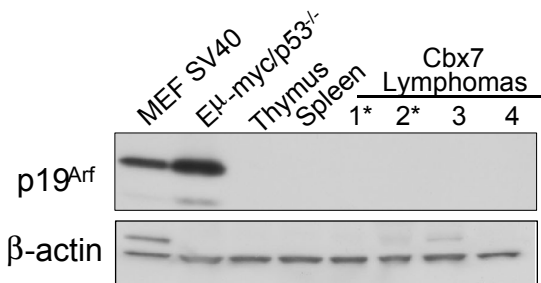**C**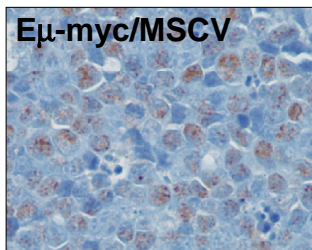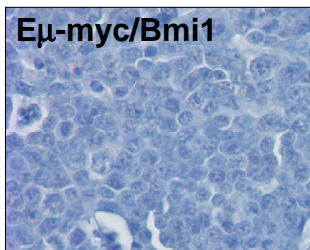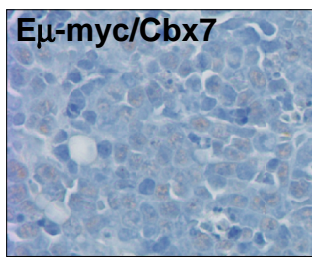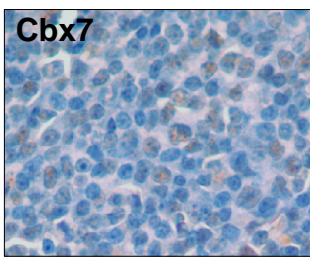

Supplement: pnas_0608721104_5.pdf [file pnas_0608721104_5.pdf]
